# Supplementary material for: Prime editing for functional repair in patient-derived disease models
Source: PubMed Central journal article supplement (PMC7584657; doi:10.1038/s41467-020-19136-7), 2020-10-23
Supplement: 41467_2020_19136_MOESM5_ESM.pdf [file 41467_2020_19136_MOESM5_ESM.pdf]

**Title:** Supplementary Data 1

**Description:** In silico predicted off-target sites, SNV, and indel counts for WGS
